# Supplementary material for: A Luciferase Mutant with Improved Brightness and Stability for Whole-Cell Bioluminescent Biosensors and In Vitro Biosensing
Source: MDPI journal article supplement (doi:10.3390/bios12090742), 2022-09-09
Supplement: s1 [file s1]

## Supplementary materials

# A Luciferase Mutant with Improved Brightness and Stability for Whole-Cell Bioluminescent Biosensors and *In Vitro* Bio-sensing

Maria Maddalena Calabretta <sup>1,2</sup>, Denise Gregucci <sup>1,2</sup>, Héctor Martínez-Pérez-Cejuela <sup>1,3</sup> and Elisa Michelini <sup>1,2,4,\*</sup>

<sup>1</sup> Department of Chemistry "Giacomo Ciamician", Alma Mater Studiorum-University of Bologna, Via Selmi 2, 40126 Bologna, Italy

<sup>2</sup> Center for Applied Biomedical Research (CRBA), IRCCS St. Orsola Hospital, Bologna, 40138, Italy

<sup>3</sup> CLECEM Group, Department of Analytical Chemistry, University of Valencia, C/Dr. Moliner, 50, 46100, Burjassot, Valencia, Spain

<sup>4</sup> Health Sciences and Technologies Interdepartmental Center for Industrial Research (HSTICIR), University of Bologna, 40126 Bologna, Italy

\* Correspondence: elisa.michelini8@unibo.it; +39 051 20 9 9533

```

1                               82
PpyLuc MEDAKNIKKGPAPFYPLEDGTAGEQLHKAMKRYALVPGTIAFTDAHIEVNITYAEYFEMSVRLAEAMKRYGLNTNHRIVVCS
BgLuc  MEDAKNIKKGPAPRYPLEDGTAGEQLHKAMKRYALVPGTIAFTDAHIEVDITYAEYFEMSVRLAEAMKRYGLNTNHRIVVCS
.....

83                               164
PpyLuc ENSLQFFMPVLGALFIGVAVAPANDIYNERELLNSMNI SQPTVVVFSKKG LQKILNVQKLP I IQK I IIMDSKTDYQGFQSM
BgLuc  ENSLQFFMPVLGALFIGVAVAPANDIYNERELLNSMNI SQPTVVVFSKKG LQKILNVQKLP I IQK I IIMDSKTDYQGFQSM
.....

165                              246
PpyLuc YTFVTSHLPPGFNEYDFVPESFDRDKTIALIMNSSGSTGLPKGVALPHRTACVRFSHARDPIFGNQIIPDTAILSVVPFHHG
BgLuc  YTFVTSHLPPGFNEYDFKPEFSDRDKTIALIMNSSGSTGLPKGVALPHRALCVRFSHARDPIFGNQIKPDTAILSVVPFHHA
.....

247                              328
PpyLuc FGMFTTLGYLICGFRVVLMYRFEEELFLRSLQDYKIQSALLVPTLFSFFAKSTLIDKYDLSNLHEIASGGAPLSKEVGEAVA
BgLuc  FGMSTTLGYLICGFRVVLMYRFEEELFLRSLQDYKIQSALLVPTLFSFIAKSTLIDKYDLSNLHEIASGGAPLSKEVGEAVA
.....

329                              410
PpyLuc KRFHLPGIRQGYGLTETTSAILITPEGDDKPGAVGKVVPFPEAKVVDLDTGKTLGVNQRGELCVRGPMIMSGYVNNPEATNA
BgLuc  KRFHLPGIRQGYGLTETTSAILITPKGDDKPGAVGKVVPFPEAKVVDLDTGKTLGVNQRGELCVRGPMIMSGYVNNPEATNA
.....

411                              492
PpyLuc LIDKDGWLHSGDIAYWDEDEHFFIVDR LKSLIKYKGYQVAPAELESILLQHPNIFDAGVAGLPDDDAGELPAAVVVLEHGKT
BgLuc  LIDKDGWLHSGDIAYWDEDEHFFIVDR LKSLIKYKGYQVAPAELESILLQHPNIRDAGVAGLPDDDAGELPAAVVVLEHGKT
.....

493                              550
PpyLuc MTEKEIVDYVASQVTTAKKLRGGVVFVDEVPKGLTGKLDARKIREILI KAKKGGKSKL
BgLuc  MTEKEIVDYVASQVTTAKKLRGGVVFVDEVPKGLTGKLDARKIREILI KAKKGGKI--
.....

```

**Figure S1.** Amino acid alignment of the BgLuc and PpyLuc luciferases. The red highlighted residues indicate the mutated amino acids.

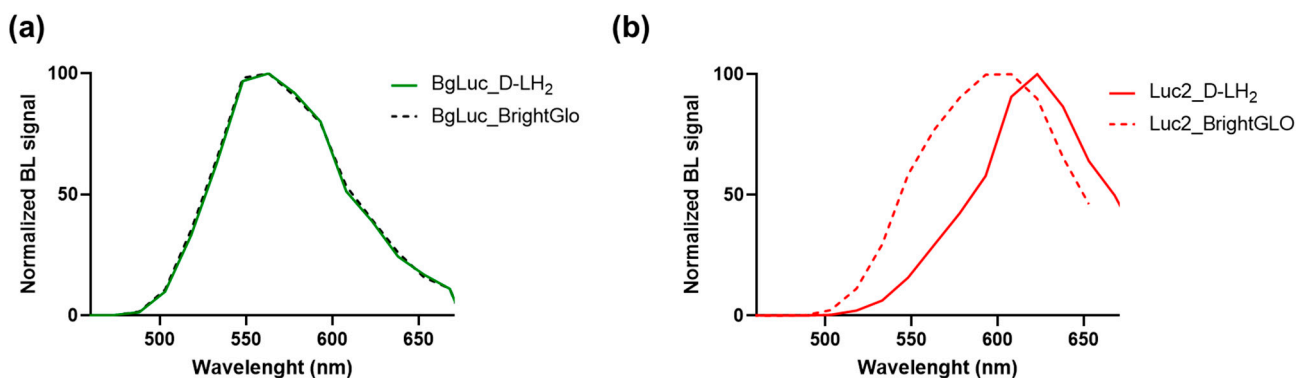

**Figure S2:** Emission spectra of (a) BgLuc and (b) Luc2 luciferase in HEK293T cells obtained with D-LH<sub>2</sub> substrate in citrate buffer (1.0 mM, pH 5.0) (solid line) and BrightGlo substrate (dotted line).

(a)

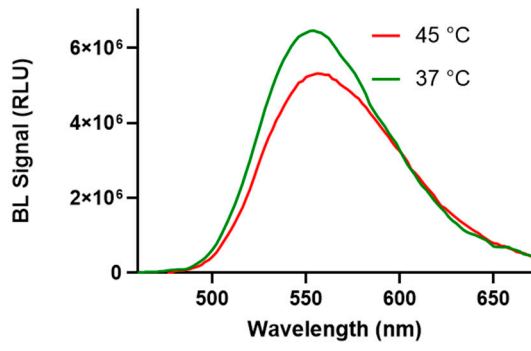

(b)

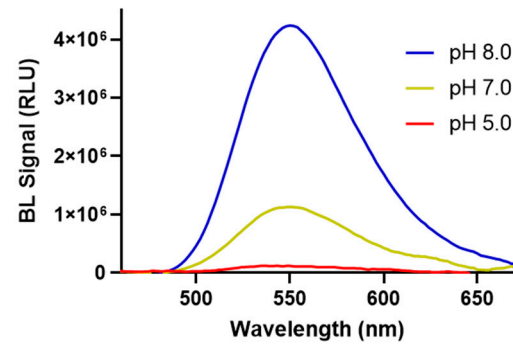

**Figure S3:** BgLuc mutant emission spectra obtained (a) at different temperatures and (b) at different pH with the commercial BrightGlo substrate.
